# Supplementary material
Source: HighWire-hosted journal article supplement (https://www.annfammed.org/highwire/filestream/8111/field_highwire_adjunct_files/0/Verstappen_Suppl_Fig.pdf)
Supplement: Verstappen_Suppl_Fig.pdf [file Verstappen_Suppl_Fig.pdf]

**Online Supplementary Material**

Verstappen W, van der Weijden T, Dubois WI, et al. Improving test ordering in primary care: the added value of a small group quality improvement strategy over classic feedback only a multicenter randomized trial. *Ann Fam Med.* 2004;2:569-575.

<http://www.annfammed.org/cgi/content/full/2/6/569/DC1>

**Supplemental figure. An example of a feedback report.**

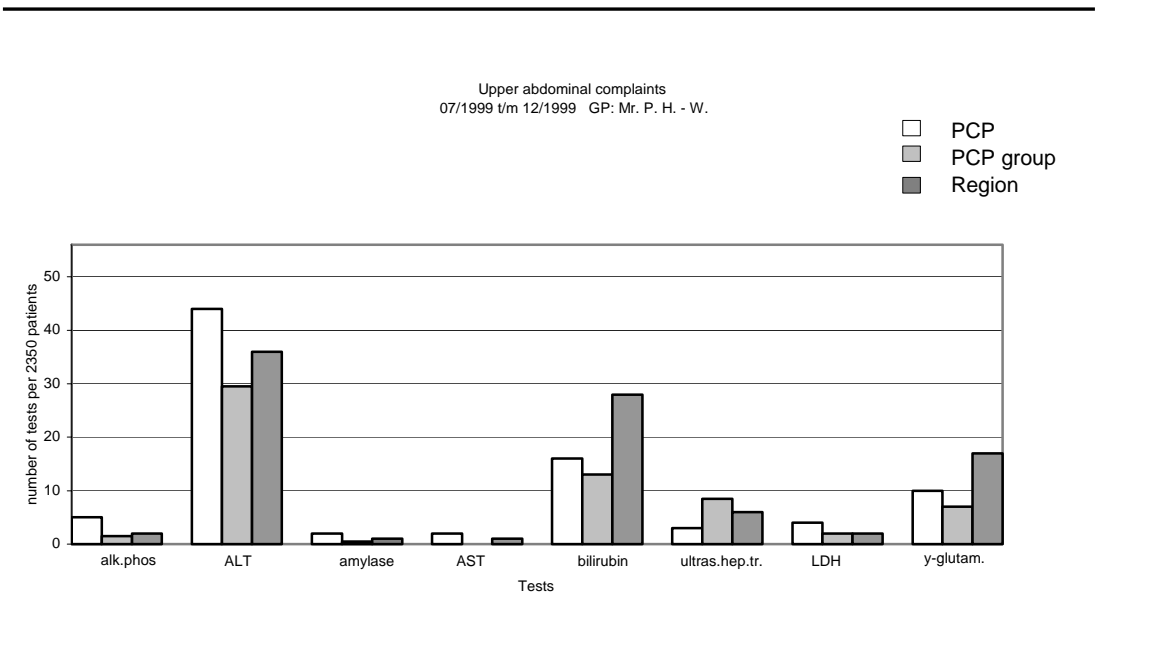

PCP = primary care physician; alk.ph = alkaline phosphatase; ALT = alanine aminotransferase; amyl = amylase; AST = aspartate aminotransferase; biliru = bilirubin; ultras.h = ultrasound of hepatobiliary tract; LDH = lactic dehydrogenase; γ-glutam = γ-glutamyltransferase.

Note: Bars in white indicate numbers of tests ordered by PCP during 6 months; bars in gray indicate mean numbers of tests of PCP practice group; and bars in dark indicate mean numbers of tests per PCP in region.
